# Supplementary material for: Structural variability, unusual thermochromic luminescence and nitrobenzene sensing properties of five Zn(ii) coordination polymers assembled from a terphenyl-hexacarboxylate ligand
Source: Royal Society of Chemistry journal article supplement (doi:10.1039/c5ce00420a), 2015-01-01
Supplement: c5ce00420a1.pdf [file c5ce00420a1.pdf]

## Supporting Information

### **Structural Variability, Unusual Thermochromic Luminescence and Nitrobenzene Sensing Property of Five Zn(II) Coordination Polymers Assembled from a Terphenyl-Hexacarboxylate Ligand**

Xiu-Yan Wan<sup>ab</sup>, Fei-Long Jiang<sup>a</sup>, Lian Chen<sup>a\*</sup>, Jie Pan<sup>ab</sup>, Kang Zhou<sup>a</sup>, Kong-Zhao Su<sup>ab</sup>, Jian-Dong Pang<sup>ab</sup>, Guang-Xun Lyu<sup>ab</sup> and Mao-Chun Hong<sup>a\*</sup>

<sup>a</sup> Key Laboratory of Optoelectronic Materials Chemistry and Physics, Fujian Institute of Research on the Structure of Matter, Chinese Academy of Sciences, Fuzhou, 350002, China

<sup>b</sup> University of the Chinese Academy of Sciences, Beijing, 100049, China

To whom correspondence should be addressed. Tel: +86-591-83792460. Fax: +86-591-83794946.

E-mail: cl@fjirsm.ac.cn, hmc@fjirsm.ac.cn.

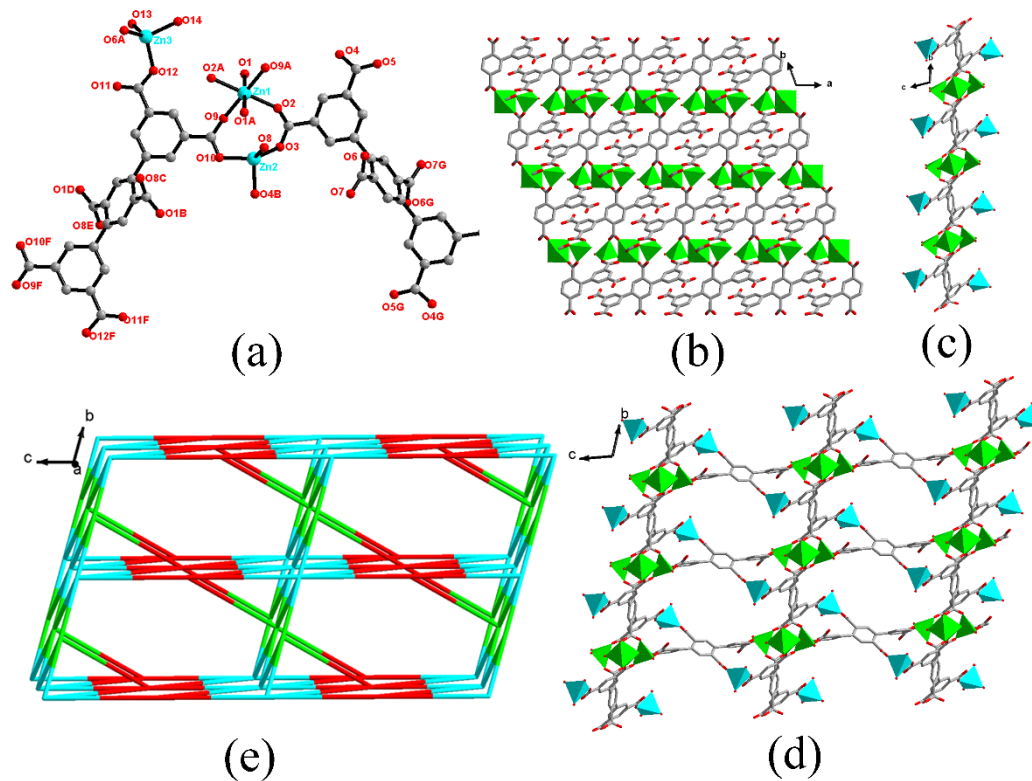

**Figure S1.** (a) The coordination environments for Zn(II) ions in **1**; (b) The 2D layer in *bc* plane formed by hourglass clusters connected by ligands with MODE I (polyhedron: green for Zn1 and Zn2, cyan for Zn3); (c) View of the layer structure along *a* axis; (d) Schematic representation of ligands pillaring the 2D layer to form 3D framework; (e) Schematic representation of topology of **1**.

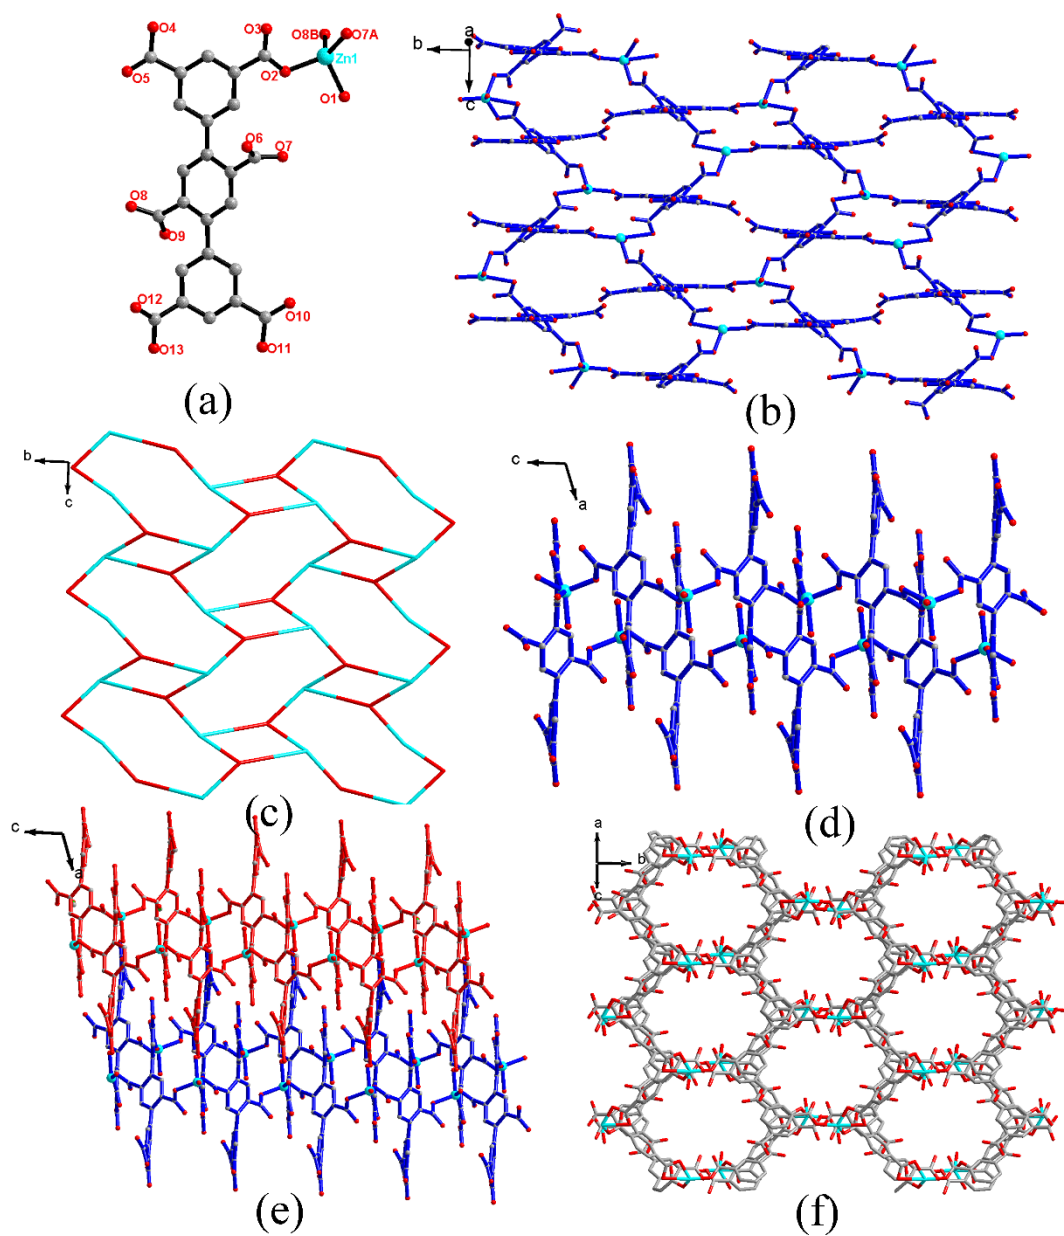

**Figure S2.** (a) The coordination environments for Zn(II) ions in **2**; (b) The 2D layer formed by Zn centers and ligands; (c) The 2D Shubnikov plane net viewed along *a* axis; (d) The thick layer consisted of two parallel Zn(II) layers viewed along *b* axis; (e) The 3D framework stacked in zipping way viewed along *b* axis; (f) View of hexagon channels in **2**.

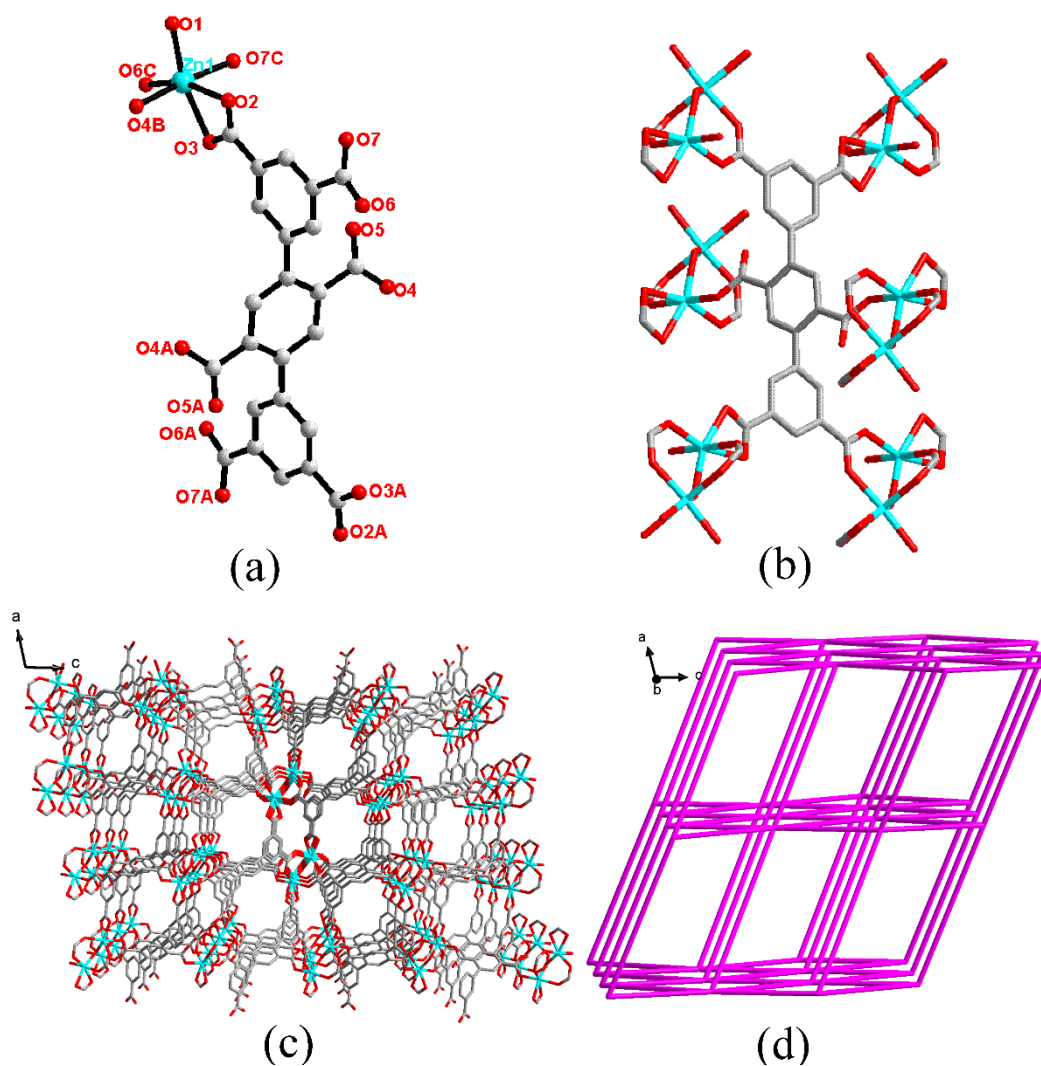

**Figure S3.** (a) The coordination environments for Zn(II) ions in **3**; (b) The repeated units formed by Zn centers and ligands; (c) The 3D framework viewed along *b* axis; (d) Schematic representation of topology of **3**.

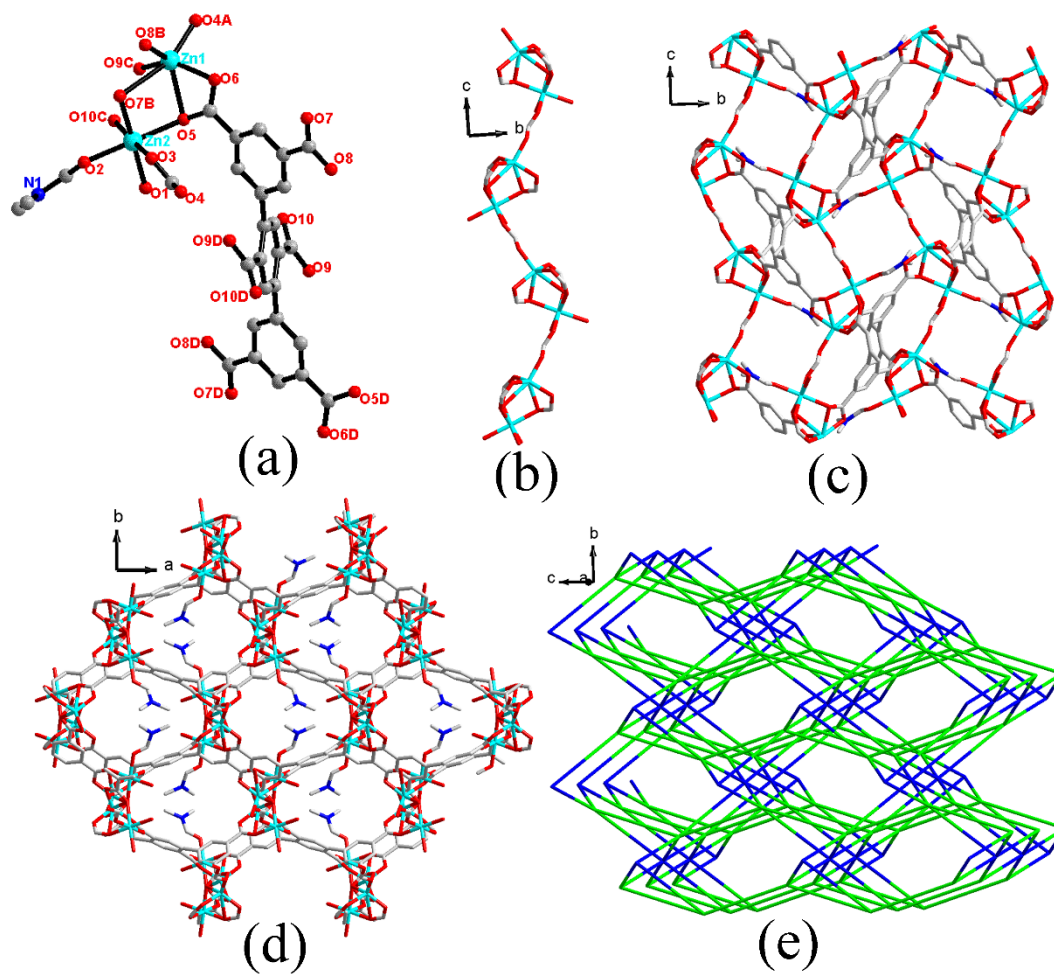

**Figure S4.** (a) The coordination environments for Zn(II) ions in 4; (b) The 1D chain formed by binuclear Zn centers and  $\mu$ -COO<sup>-</sup>. (c) the quasi-plane generated by linked 1D chains with ligands; (d) The 3D framework with a distorted quadrangular channel viewed along *c* axis; (e) Schematic representation of topology of 4.

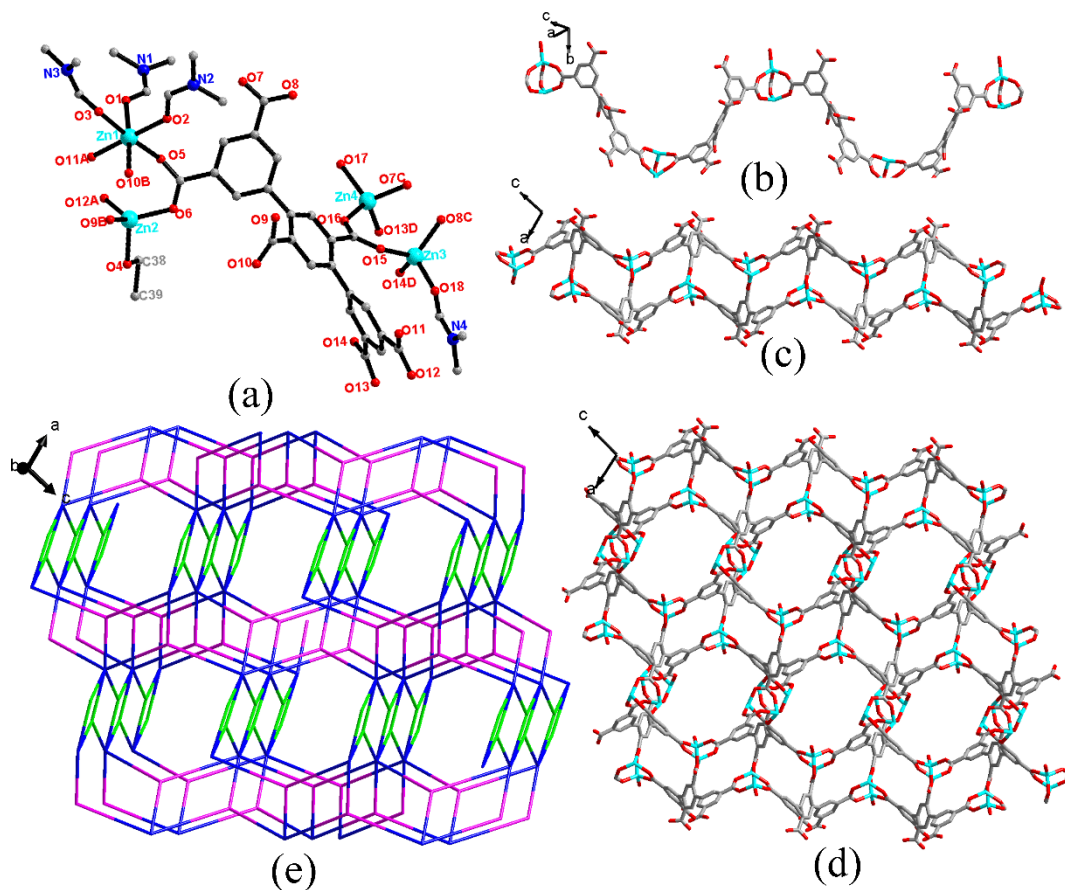

**Figure S5.** (a) The coordination environments for Zn(II) ions in **5**; (b) The 1D chain formed by binuclear clusters B and ligands; (c) Thick wave-like layers with two kind of rhombus channels which are mirror images; (d) The 3D porous framework of compound **5** (The coordinated DMF molecules and ethanol molecules have been removed to get a better insight of the structure); (e) Schematic representation of topology of **5**.

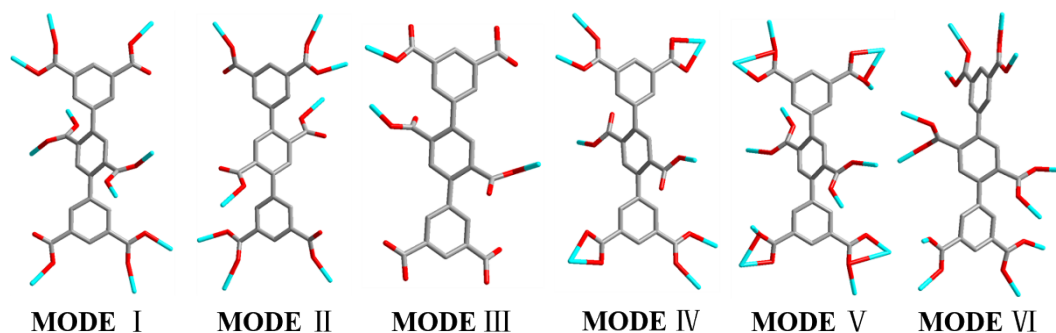

**Scheme S1.** The coordination modes of ligands in compounds **1-5**.

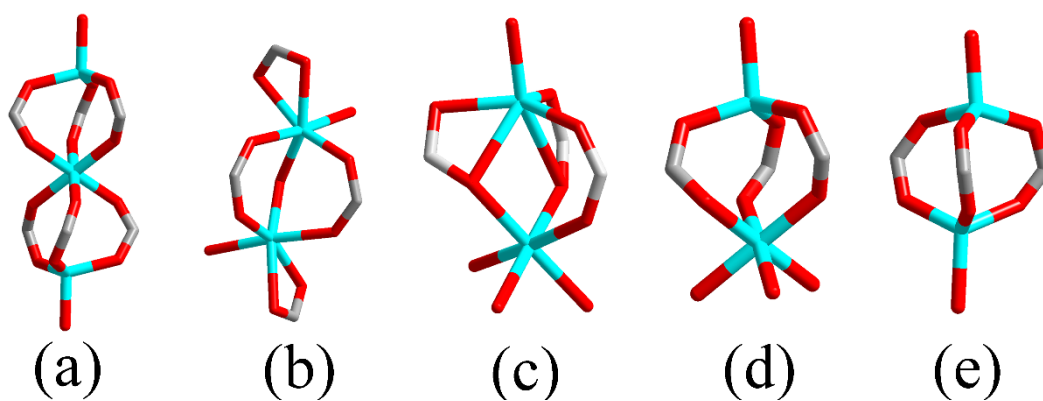

**Scheme S2.** The metal clusters in compounds **1**, **3-5**. (a) Trinuclear hourglass cluster in **1**. (b) Binuclear paddle-wheel cluster in **3**. (c) Binuclear paddle-wheel cluster in **4**. (d) Binuclear paddle-wheel cluster A in **5**. (e) Binuclear paddle-wheel cluster B in **5**.

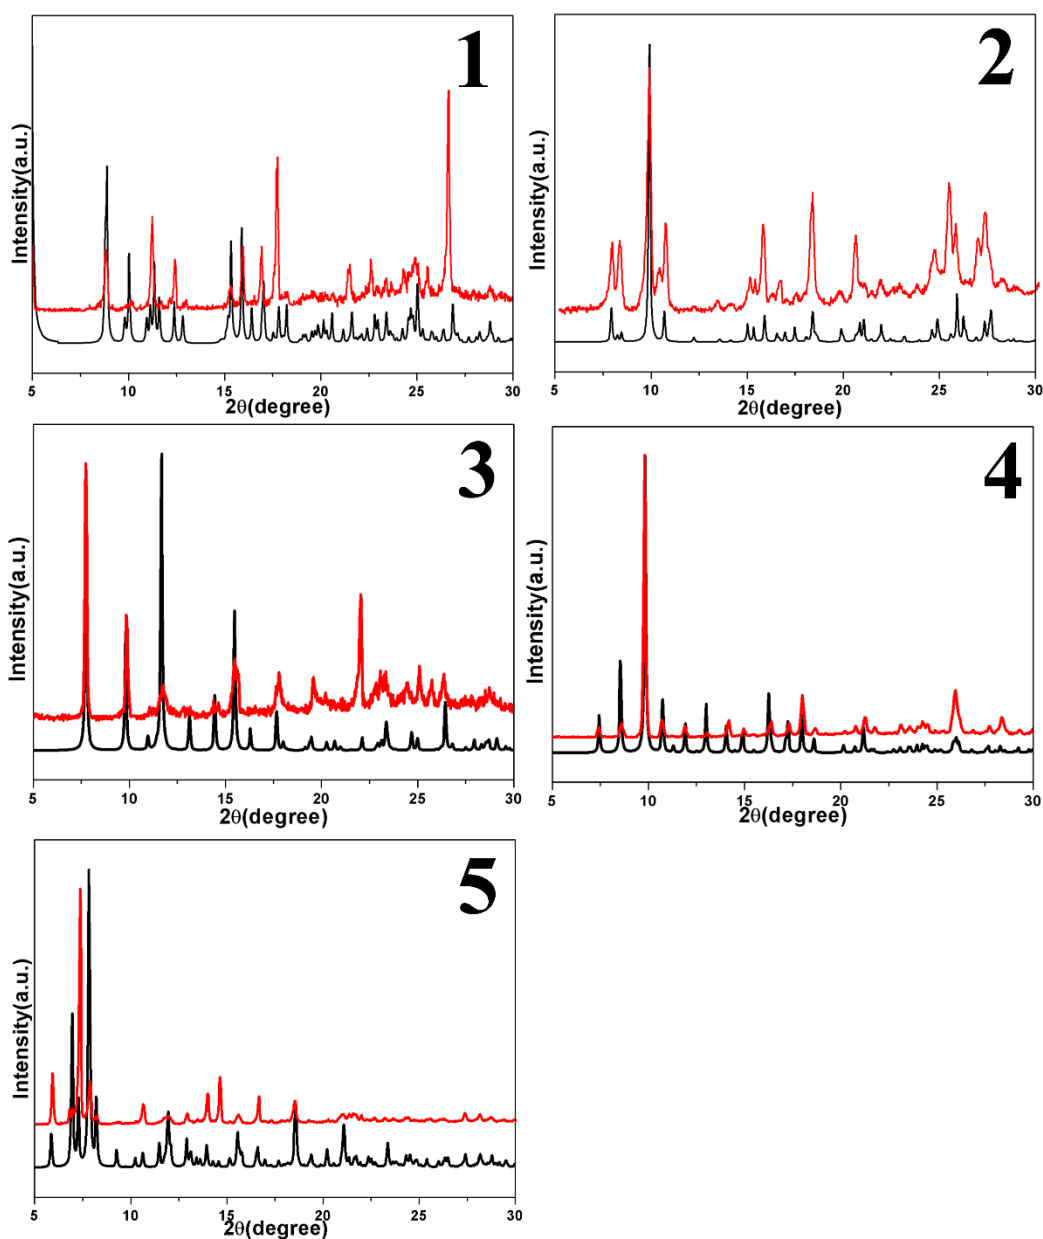

**Figure S6.** The simulated (black) and experimental (red) PXRD patterns for the compounds 1–5.

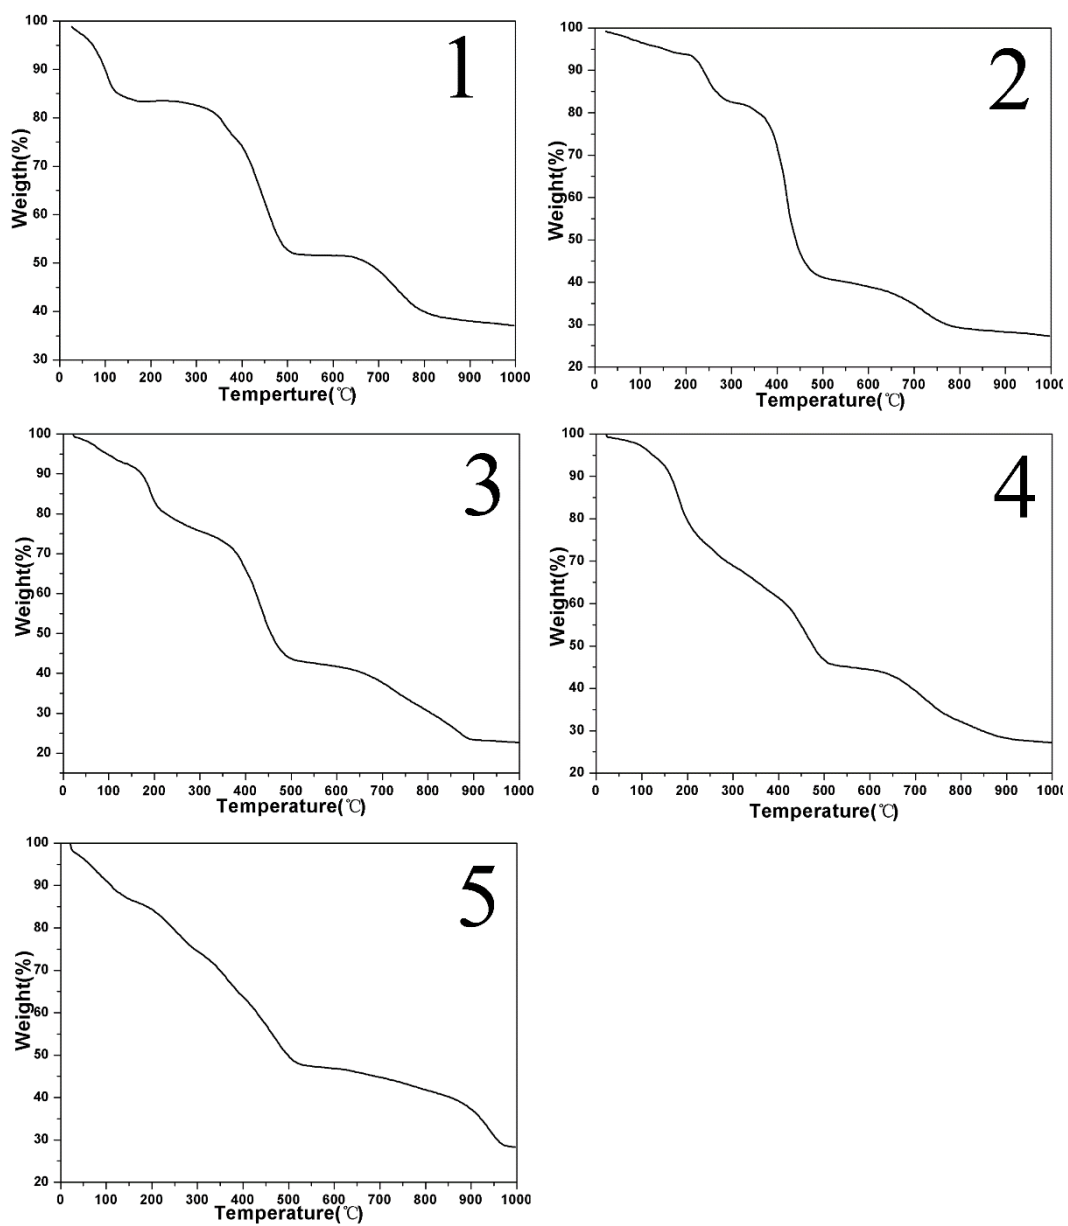

**Figure S7.** TGA curves of compounds 1–5.



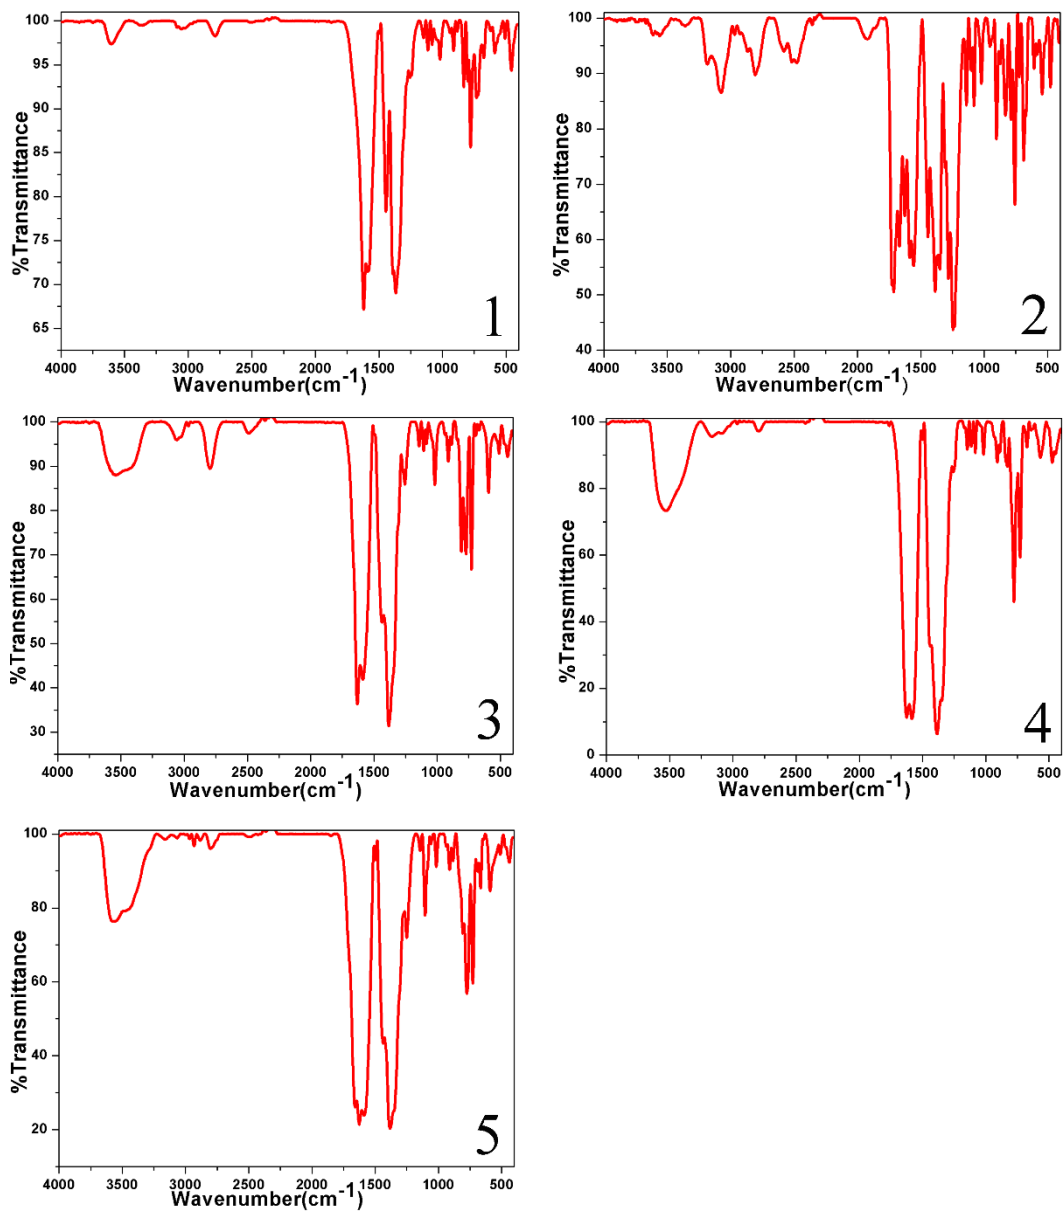

Figure S8. IR spectra of compounds 1–5.

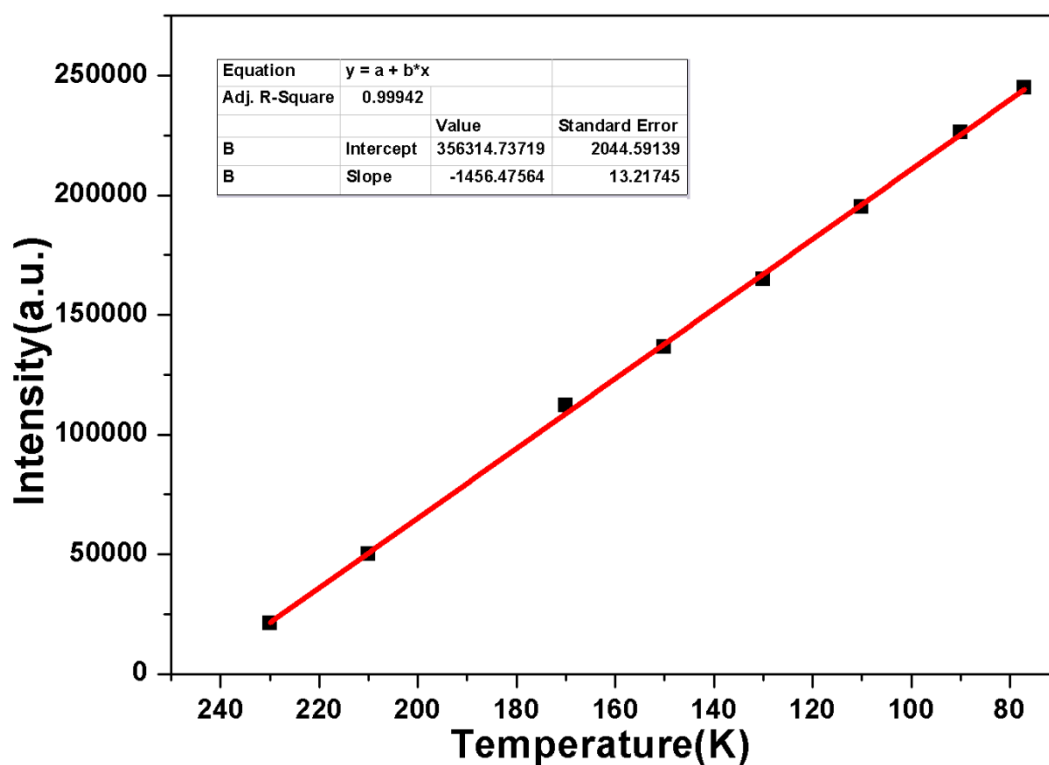

Figure S9. The scatterplot of luminescent intensity (LE band) of **3** response to temperature (rectangle box: the fitting equation  $y = -1456x + 356314$  ( $x \leq 250$ )).

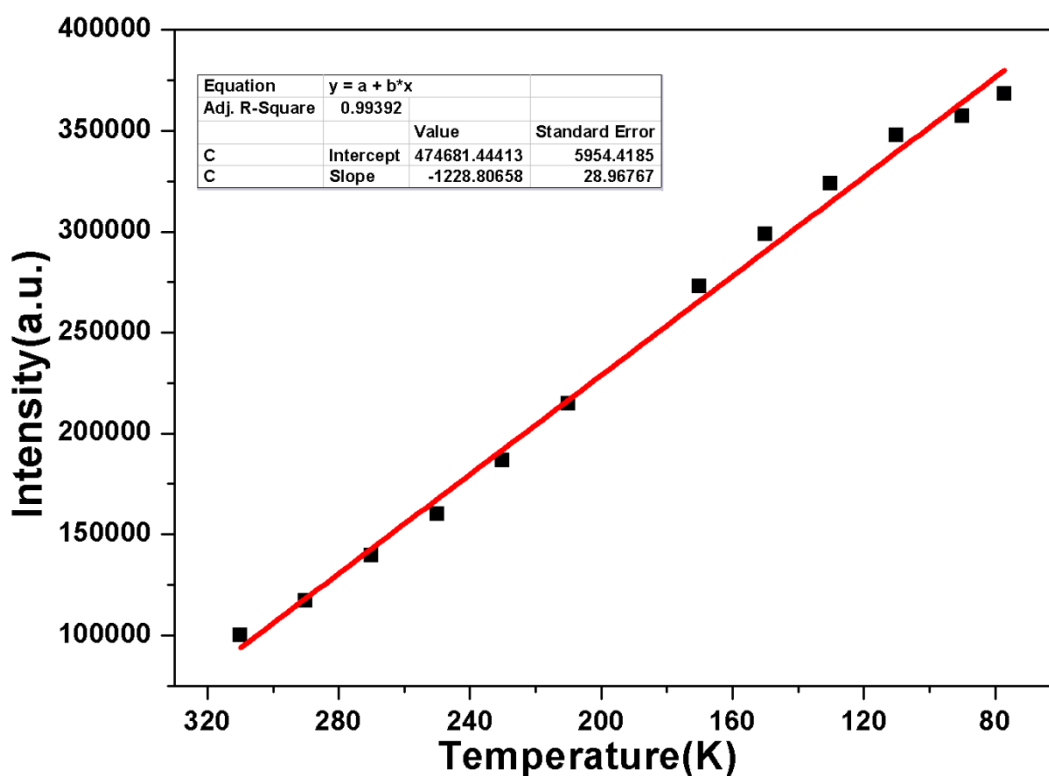

Figure S10. The scatterplot of luminescent intensity (HE band) of **5** response to temperature (rectangle box: the fitting equation  $y = -1229x + 474681$ ).

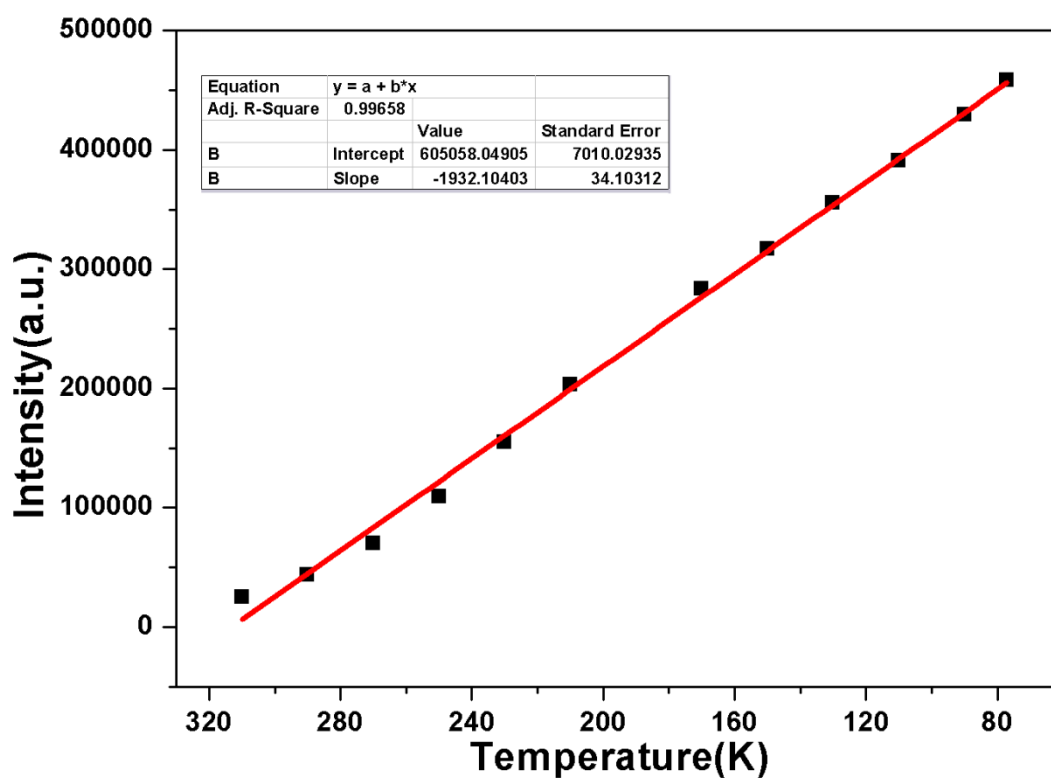

**Figure S11.** The scatterplot of luminescent intensity (LE band) of **5** response to temperature (rectangle box: the fitting equation  $y = -1932x + 605058$ ).

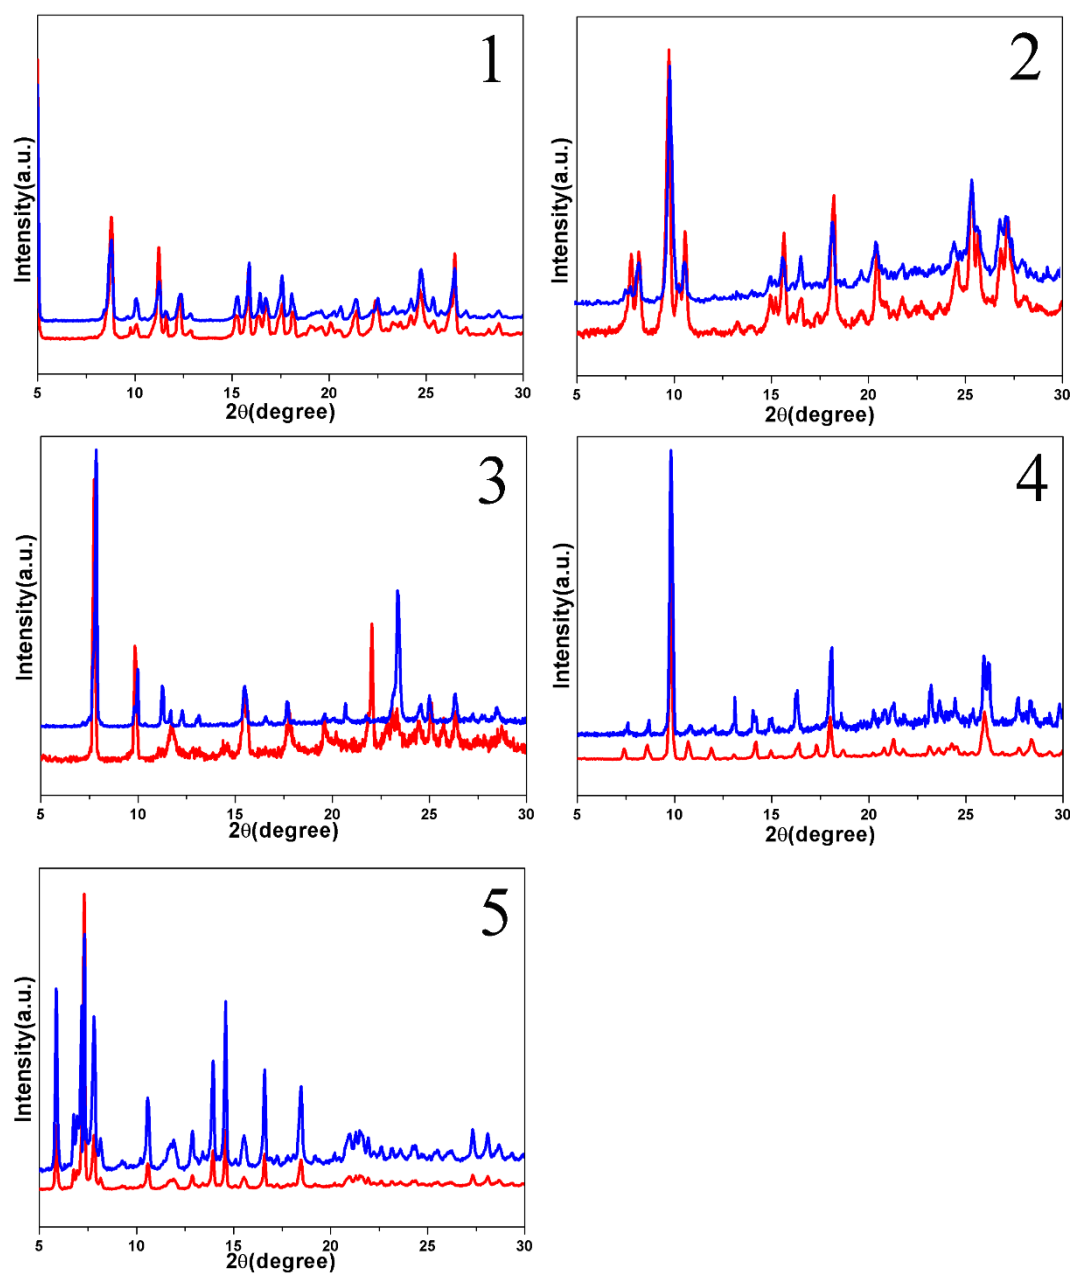

**Figure S12.** PXRD patterns of compounds **1-5** before (red) and after heated at 330 K for 30 min (blue).

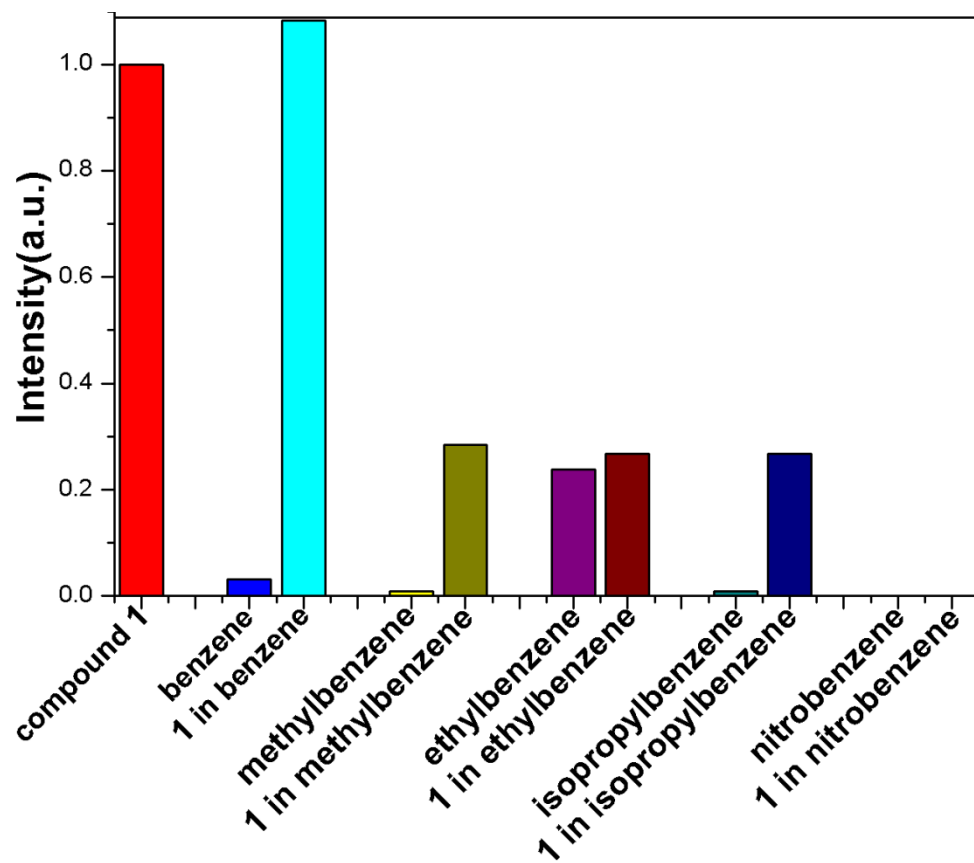

**Figure S13.** Comparison of emission intensities of different solvents and emulsions for **1**.

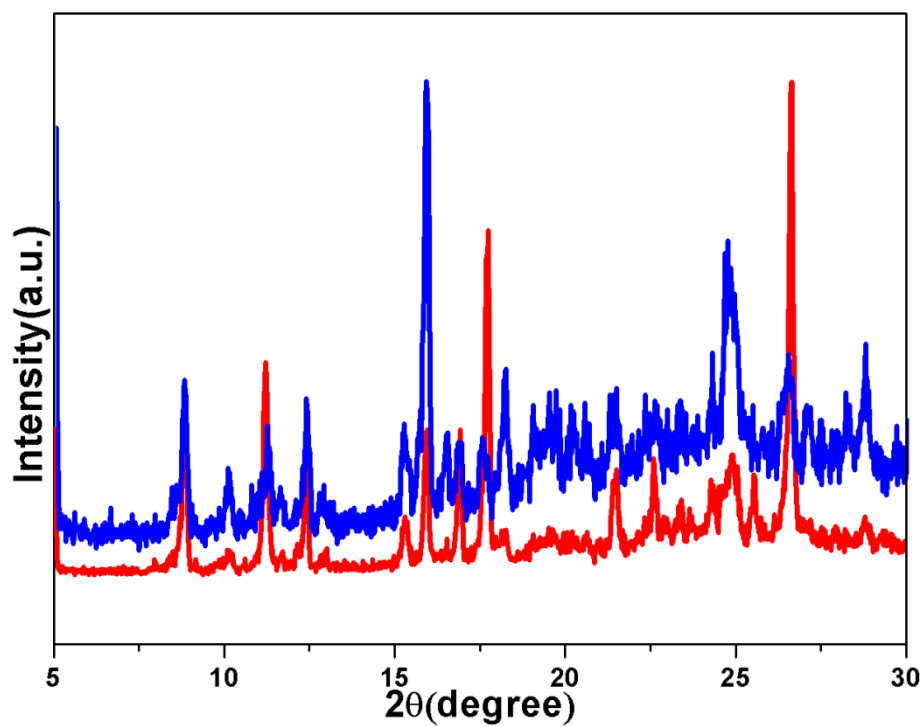

**Figure S14.** PXRD patterns of **1** before (red) and after (blue) sensing experiments.

**Table S1.** Crystal Data and Structure Refinements for compounds **1-5**.

| <i>Compounds</i>                                                          | <b>1</b>                                                                       | <b>2</b>                                            | <b>3</b>                                                                       | <b>4</b>                                                                       | <b>5</b>                                                                       |
|---------------------------------------------------------------------------|--------------------------------------------------------------------------------|-----------------------------------------------------|--------------------------------------------------------------------------------|--------------------------------------------------------------------------------|--------------------------------------------------------------------------------|
| Empirical formula                                                         | C <sub>52</sub> H <sub>72</sub> N <sub>2</sub> O <sub>44</sub> Zn <sub>5</sub> | C <sub>28</sub> H <sub>37</sub> NO <sub>19</sub> Zn | C <sub>34</sub> H <sub>46</sub> N <sub>4</sub> O <sub>18</sub> Zn <sub>2</sub> | C <sub>41</sub> H <sub>56</sub> N <sub>4</sub> O <sub>24</sub> Zn <sub>4</sub> | C <sub>41</sub> H <sub>57</sub> N <sub>5</sub> O <sub>23</sub> Zn <sub>4</sub> |
| Formula weight                                                            | 1756.16                                                                        | 756.10                                              | 929.56                                                                         | 1294.54                                                                        | 1249.55                                                                        |
| Temperature (K)                                                           | 100 (2)                                                                        | 100 (2)                                             | 100 (2)                                                                        | 100 (2)                                                                        | 100 (2)                                                                        |
| Crystal system                                                            | Triclinic                                                                      | Monoclinic                                          | Monoclinic                                                                     | Monoclinic                                                                     | Monoclinic                                                                     |
| Space group                                                               | <i>P</i> -1                                                                    | <i>P</i> <sub>2</sub> /c                            | <i>C</i> 2/c                                                                   | <i>P</i> <sub>2</sub> /c                                                       | <i>P</i> <sub>2</sub> /n                                                       |
| <i>a</i> [Å]                                                              | 9.3789(3)                                                                      | 11.0076(4)                                          | 18.3439(3)                                                                     | 12.024(3)                                                                      | 17.0549(3)                                                                     |
| <i>b</i> [Å]                                                              | 10.9247(4)                                                                     | 21.4138(8)                                          | 8.80900(10)                                                                    | 13.773(4)                                                                      | 15.3986(3)                                                                     |
| <i>c</i> [Å]                                                              | 18.8993(6)                                                                     | 13.7391(6)                                          | 23.4388(4)                                                                     | 15.850(4)                                                                      | 23.0104(5)                                                                     |
| $\alpha$ [°]                                                              | 104.858(3)                                                                     | 90.00                                               | 90.00                                                                          | 90.00                                                                          | 90.00                                                                          |
| $\beta$ [°]                                                               | 94.314(2)                                                                      | 108.520(5)                                          | 101.965(2)                                                                     | 99.093(5)                                                                      | 102.754(2)                                                                     |
| $\gamma$ [°]                                                              | 107.714(3)                                                                     | 90.00                                               | 90.00                                                                          | 90.00                                                                          | 90.00                                                                          |
| <i>V</i> [Å <sup>3</sup> ]                                                | 1758.09(10)                                                                    | 3070.8(2)                                           | 3705.22(10)                                                                    | 2591.8(11)                                                                     | 5893.9(2)                                                                      |
| <i>Z</i>                                                                  | 2                                                                              | 4                                                   | 8                                                                              | 8                                                                              | 4                                                                              |
| <i>D</i> <sub>c</sub> [g/cm <sup>3</sup> ]                                | 1.292                                                                          | 1.243                                               | 1.630                                                                          | 1.302                                                                          | 1.243                                                                          |
| $\mu$ [mm <sup>-1</sup> ]                                                 | 2.519                                                                          | 1.616                                               | 2.324                                                                          | 1.891                                                                          | 2.348                                                                          |
| <i>F</i> (000)                                                            | 678                                                                            | 1164                                                | 1880                                                                           | 1016                                                                           | 2252                                                                           |
| $\theta$ range (°)                                                        | 4.4–76.1                                                                       | 3.97–74.51                                          | 4.9–76.0                                                                       | 2.2–27.4°                                                                      | 3.9–72.9°                                                                      |
| <i>GOF</i> on <i>F</i> <sup>2</sup>                                       | 1.108                                                                          | 1.001                                               | 0.955                                                                          | 1.071                                                                          | 1.093                                                                          |
| <i>Parameters</i>                                                         | 367                                                                            | 347                                                 | 257                                                                            | 264                                                                            | 490                                                                            |
| <i>R</i> <sub>1</sub> ( <i>I</i> > 2 $\sigma$ ( <i>I</i> )) <sup>a</sup>  | 0.0465                                                                         | 0.0457                                              | 0.0551                                                                         | 0.0433                                                                         | 0.0824                                                                         |
| <i>wR</i> <sub>2</sub> ( <i>I</i> > 2 $\sigma$ ( <i>I</i> )) <sup>b</sup> | 0.1534                                                                         | 0.1056                                              | 0.1513                                                                         | 0.1284                                                                         | 0.2626                                                                         |

$$^a R_1 = \frac{\sum ||F_o| - |F_c||}{\sum |F_o|}, \quad ^b wR_2 = [\frac{\sum w(F_o^2 - F_c^2)^2}{\sum w(F_o^2)^2}]^{1/2}.$$

**Table S2.** Selected Bond Lengths (Å) and Bond Angles (°) for Complexes **1-5**.

| <b>Compound 1</b>                    |             |                          |             |
|--------------------------------------|-------------|--------------------------|-------------|
| Bond                                 | Dist.       | Bond                     | Dist.       |
| Zn1—O9                               | 2.0816 (19) | Zn2—O3                   | 1.935 (2)   |
| Zn1—O9 <sup>i</sup>                  | 2.0816 (19) | Zn2—O4 <sup>ii</sup>     | 1.946 (2)   |
| Zn1—O2                               | 2.0935 (19) | Zn2—O8                   | 1.955 (2)   |
| Zn1—O2 <sup>i</sup>                  | 2.0935 (19) | Zn3—O12                  | 1.911 (2)   |
| Zn1—O1 <sup>i</sup>                  | 2.1054 (18) | Zn3—O6 <sup>i</sup>      | 1.946 (3)   |
| Zn1—O1                               | 2.1054 (18) | Zn3—O13                  | 1.958 (4)   |
| Zn2—O10                              | 1.924 (2)   | Zn3—O14                  | 1.962 (3)   |
| Angle                                | (°)         | Angle                    | (°)         |
| O9—Zn1—O9 <sup>i</sup>               | 180.0       | O10—Zn2—O4 <sup>ii</sup> | 94.14 (10)  |
| O9—Zn1—O2                            | 94.13 (8)   | O3—Zn2—O4 <sup>ii</sup>  | 110.01 (9)  |
| O9 <sup>i</sup> —Zn1—O2              | 85.87 (8)   | O10—Zn2—O8               | 116.63 (10) |
| O9—Zn1—O2 <sup>i</sup>               | 85.87 (8)   | O3—Zn2—O8                | 101.42 (9)  |
| O9 <sup>i</sup> —Zn1—O2 <sup>i</sup> | 94.13 (8)   | O4 <sup>ii</sup> —Zn2—O8 | 105.01 (10) |

|                                      |             |                          |             |
|--------------------------------------|-------------|--------------------------|-------------|
| O2—Zn1—O2 <sup>i</sup>               | 180.00 (11) | O12—Zn3—O6 <sup>i</sup>  | 108.02 (12) |
| O9—Zn1—O1 <sup>i</sup>               | 95.30 (8)   | O12—Zn3—O13              | 116.18 (14) |
| O9 <sup>i</sup> —Zn1—O1 <sup>i</sup> | 84.70 (8)   | O6 <sup>i</sup> —Zn3—O13 | 109.24 (18) |
| O2—Zn1—O1 <sup>i</sup>               | 92.77 (7)   | O12—Zn3—O14              | 102.92 (12) |
| O2 <sup>i</sup> —Zn1—O1 <sup>i</sup> | 87.23 (7)   | O6 <sup>i</sup> —Zn3—O14 | 112.13 (13) |
| O9—Zn1—O1                            | 84.70 (8)   | O13—Zn3—O14              | 108.31 (18) |
| O9 <sup>i</sup> —Zn1—O1              | 95.30 (8)   | C1—O2—Zn1                | 147.87 (18) |
| O2—Zn1—O1                            | 87.23 (7)   | C13—O9—Zn1               | 142.62 (19) |
| O2 <sup>i</sup> —Zn1—O1              | 92.77 (7)   | C13—O10—Zn2              | 116.16 (18) |
| O1 <sup>i</sup> —Zn1—O1              | 180.0       | C1—O3—Zn2                | 120.01 (18) |
| O10—Zn2—O3                           | 127.56 (10) |                          |             |

Symmetry codes: (i) 2-x, 2-y, -z; (ii) 1+x, y, z.

### Compound 2

| Bond                                  | Dist.       | Bond                                   | Dist.       |
|---------------------------------------|-------------|----------------------------------------|-------------|
| Zn1—O2                                | 1.931 (2)   | Zn1—O7 <sup>i</sup>                    | 1.988 (2)   |
| Zn1—O1                                | 1.9861 (15) | Zn1—O8 <sup>ii</sup>                   | 1.992 (2)   |
| Angle                                 | (°)         | Angle                                  | (°)         |
| O2—Zn1—O1                             | 97.60 (8)   | O1—Zn1—C16 <sup>i</sup>                | 95.44 (8)   |
| O2—Zn1—O7 <sup>i</sup>                | 115.42 (10) | O7 <sup>i</sup> —Zn1—C16 <sup>i</sup>  | 28.80 (9)   |
| O1—Zn1—O7 <sup>i</sup>                | 114.46 (10) | O8 <sup>ii</sup> —Zn1—C16 <sup>i</sup> | 99.47 (9)   |
| O2—Zn1—O8 <sup>ii</sup>               | 111.12 (10) | C1—O2—Zn1                              | 124.4 (2)   |
| O1—Zn1—O8 <sup>ii</sup>               | 103.41 (10) | C16—O7—Zn1 <sup>i</sup>                | 102.86 (17) |
| O7 <sup>i</sup> —Zn1—O8 <sup>ii</sup> | 113.23 (8)  | C12—O8—Zn1 <sup>iii</sup>              | 118.58 (18) |
| O2—Zn1—C16 <sup>i</sup>               | 142.69 (10) |                                        |             |

Symmetry codes: (i) 2-x, 2-y, 1-z; (ii) 2-x, 1/2+y, 3/2-z; (iii) 2-x, -1/2+y, 3/2-z.

### Compound 3

| Bond                                  | Dist.       | Bond                                     | Dist.       |
|---------------------------------------|-------------|------------------------------------------|-------------|
| Zn1—O1                                | 2.019 (2)   | Zn1—O5 <sup>iii</sup>                    | 2.133 (2)   |
| Zn1—O3                                | 2.084 (2)   | Zn1—O4 <sup>iii</sup>                    | 2.237 (2)   |
| Zn1—O2 <sup>i</sup>                   | 2.086 (2)   | Zn1—C5 <sup>iii</sup>                    | 2.505 (3)   |
| Zn1—O7 <sup>ii</sup>                  | 2.101 (2)   |                                          |             |
| Angle                                 | (°)         | Angle                                    | (°)         |
| O1—Zn1—O3                             | 105.25 (9)  | O5 <sup>iii</sup> —Zn1—O4 <sup>iii</sup> | 60.35 (9)   |
| O1—Zn1—O2 <sup>i</sup>                | 92.43 (10)  | O1—Zn1—C5 <sup>iii</sup>                 | 128.75 (11) |
| O3—Zn1—O2 <sup>i</sup>                | 88.72 (8)   | O3—Zn1—C5 <sup>iii</sup>                 | 125.99 (10) |
| O1—Zn1—O7 <sup>ii</sup>               | 90.48 (11)  | O2 <sup>i</sup> —Zn1—C5 <sup>iii</sup>   | 88.15 (10)  |
| O3—Zn1—O7 <sup>ii</sup>               | 90.63 (8)   | O7 <sup>ii</sup> —Zn1—C5 <sup>iii</sup>  | 89.93 (10)  |
| O2 <sup>i</sup> —Zn1—O7 <sup>ii</sup> | 177.09 (11) | O5 <sup>iii</sup> —Zn1—C5 <sup>iii</sup> | 30.01 (10)  |
| O1—Zn1—O5 <sup>iii</sup>              | 98.76 (9)   | O4 <sup>iii</sup> —Zn1—C5 <sup>iii</sup> | 30.34 (10)  |
| O3—Zn1—O5 <sup>iii</sup>              | 155.89 (9)  | C12—O7—Zn1 <sup>iv</sup>                 | 127.6 (2)   |

|                                         |            |                         |             |
|-----------------------------------------|------------|-------------------------|-------------|
| O2 <sup>i</sup> —Zn1—O5 <sup>iii</sup>  | 88.09 (9)  | Zn1—O3—Zn1 <sup>i</sup> | 107.00 (14) |
| O7 <sup>ii</sup> —Zn1—O5 <sup>iii</sup> | 91.35 (10) | C1—O2—Zn1 <sup>i</sup>  | 131.3 (2)   |
| O1—Zn1—O4 <sup>iii</sup>                | 159.04 (9) | C5—O5—Zn1 <sup>v</sup>  | 91.6 (2)    |
| O3—Zn1—O4 <sup>iii</sup>                | 95.69 (8)  | C5—O4—Zn1 <sup>v</sup>  | 86.60 (19)  |
| O2 <sup>i</sup> —Zn1—O4 <sup>iii</sup>  | 88.72 (9)  | C1—O1—Zn1               | 124.9 (2)   |
| O7 <sup>ii</sup> —Zn1—O4 <sup>iii</sup> | 88.52 (10) |                         |             |

**Symmetry codes: (i) 1-x, y, 3/2-z; (ii) x, 1+y, z; (iii) -1/2+x, 1/2+y, z; (iv) x, -1+y, z; (v) 1/2+x, -1/2+y, z.**

| <b>Compound 4</b>                       |             |                           |             |
|-----------------------------------------|-------------|---------------------------|-------------|
| Bond                                    | Dist.       | Bond                      | Dist.       |
| Zn1—O8 <sup>i</sup>                     | 1.947 (2)   | Zn2—O3                    | 2.052 (2)   |
| Zn1—O9 <sup>ii</sup>                    | 1.954 (2)   | Zn2—O7 <sup>i</sup>       | 2.085 (2)   |
| Zn1—O4 <sup>iii</sup>                   | 1.977 (2)   | Zn2—O2                    | 2.106 (3)   |
| Zn1—O6                                  | 2.107 (3)   | Zn2—O1                    | 2.118 (3)   |
| Zn1—O5                                  | 2.342 (3)   | Zn2—O5                    | 2.222 (3)   |
| Zn2—O10 <sup>ii</sup>                   | 2.045 (2)   |                           |             |
| Angle                                   | (°)         | Angle                     | (°)         |
| O8 <sup>i</sup> —Zn1—O9 <sup>ii</sup>   | 111.79 (11) | O3—Zn2—O7 <sup>i</sup>    | 86.21 (10)  |
| O8 <sup>i</sup> —Zn1—O4 <sup>iii</sup>  | 107.25 (11) | O10 <sup>ii</sup> —Zn2—O2 | 90.57 (10)  |
| O9 <sup>ii</sup> —Zn1—O4 <sup>iii</sup> | 98.78 (9)   | O3—Zn2—O2                 | 90.62 (12)  |
| O8 <sup>i</sup> —Zn1—O6                 | 99.20 (12)  | O7 <sup>i</sup> —Zn2—O2   | 90.29 (12)  |
| O9 <sup>ii</sup> —Zn1—O6                | 142.35 (10) | O10 <sup>ii</sup> —Zn2—O1 | 91.00 (10)  |
| O4 <sup>iii</sup> —Zn1—O6               | 91.57 (11)  | O3—Zn2—O1                 | 93.31 (11)  |
| O8 <sup>i</sup> —Zn1—O5                 | 114.86 (10) | O7 <sup>i</sup> —Zn2—O1   | 178.81 (12) |
| O9 <sup>ii</sup> —Zn1—O5                | 88.60 (9)   | O2—Zn2—O1                 | 88.62 (13)  |
| O4 <sup>iii</sup> —Zn1—O5               | 130.75 (11) | O10 <sup>ii</sup> —Zn2—O5 | 87.30 (9)   |
| O6—Zn1—O5                               | 58.31 (10)  | O3—Zn2—O5                 | 91.59 (11)  |
| O8 <sup>i</sup> —Zn1—C2                 | 110.11 (11) | O7 <sup>i</sup> —Zn2—O5   | 90.91 (11)  |
| O9 <sup>ii</sup> —Zn1—C2                | 115.59 (11) | O2—Zn2—O5                 | 177.55 (10) |
| O4 <sup>iii</sup> —Zn1—C2               | 112.62 (12) | O1—Zn2—O5                 | 90.19 (12)  |
| O6—Zn1—C2                               | 29.41 (11)  | C13—O9—Zn1 <sup>iv</sup>  | 133.34 (19) |
| O5—Zn1—C2                               | 28.91 (10)  | C13—O10—Zn2 <sup>iv</sup> | 135.0 (2)   |
| O10 <sup>ii</sup> —Zn2—O3               | 175.56 (9)  | C6—O7—Zn2 <sup>v</sup>    | 155.0 (3)   |
| O10 <sup>ii</sup> —Zn2—O7 <sup>i</sup>  | 89.51 (10)  | C6—O8—Zn1 <sup>v</sup>    | 113.4 (2)   |

**Symmetry codes: (i) 3-x, -1/2+y, 1/2-z; (ii) 2-x, -1/2+y, 1/2-z; (iii) x, 1/2-y, 1/2+z; (iv) 2-x, 1/2+y, 1/2-z; (v) 3-x, 1/2+y, 1/2-z.**

| <b>Compound 5</b> |             |        |             |
|-------------------|-------------|--------|-------------|
| Bond              | Dist.       | Bond   | Dist.       |
| Zn1—O2            | 2.0593 (12) | Zn2—O4 | 2.0011 (11) |



|                                                                                                                                                     |             |                                          |             |
|-----------------------------------------------------------------------------------------------------------------------------------------------------|-------------|------------------------------------------|-------------|
| Zn1—O5                                                                                                                                              | 2.0737 (12) | Zn3—O14 <sup>iii</sup>                   | 1.911 (2)   |
| Zn1—O10 <sup>i</sup>                                                                                                                                | 2.0839 (11) | Zn3—O8 <sup>iv</sup>                     | 1.945 (2)   |
| Zn1—O11 <sup>ii</sup>                                                                                                                               | 2.0856 (12) | Zn3—O15                                  | 1.9628 (13) |
| Zn1—O3                                                                                                                                              | 2.0956 (11) | Zn3—O18                                  | 1.9803 (12) |
| Zn1—O1                                                                                                                                              | 2.0975 (11) | Zn4—O16                                  | 1.9363 (13) |
| Zn2—O6                                                                                                                                              | 1.9465 (12) | Zn4—O7 <sup>iv</sup>                     | 1.959 (2)   |
| Zn2—O12 <sup>ii</sup>                                                                                                                               | 1.9485 (11) | Zn4—O13 <sup>iii</sup>                   | 1.9599 (17) |
| Zn2—O9 <sup>i</sup>                                                                                                                                 | 1.9585 (12) | Zn4—O17                                  | 2.1643 (12) |
| Angle                                                                                                                                               | (°)         | Angle                                    | (°)         |
| O2—Zn1—O5                                                                                                                                           | 86.5        | O8 <sup>iv</sup> —Zn3—O18                | 108.74 (7)  |
| O2—Zn1—O10 <sup>i</sup>                                                                                                                             | 89.0        | O15—Zn3—O18                              | 98.25 (7)   |
| O5—Zn1—O10 <sup>i</sup>                                                                                                                             | 94.4        | O16—Zn4—O7 <sup>iv</sup>                 | 110.07 (8)  |
| O2—Zn1—O11 <sup>ii</sup>                                                                                                                            | 178.66 (6)  | O16—Zn4—O13 <sup>iii</sup>               | 110.12 (9)  |
| O5—Zn1—O11 <sup>ii</sup>                                                                                                                            | 92.1        | O7 <sup>iv</sup> —Zn4—O13 <sup>iii</sup> | 105.5       |
| O10 <sup>i</sup> —Zn1—O11 <sup>ii</sup>                                                                                                             | 91.1        | O16—Zn4—O17                              | 111.24 (6)  |
| O2—Zn1—O3                                                                                                                                           | 91.0        | O7 <sup>iv</sup> —Zn4—O17                | 110.83 (6)  |
| O5—Zn1—O3                                                                                                                                           | 175.09 (6)  | O13 <sup>iii</sup> —Zn4—O17              | 108.91 (5)  |
| O10 <sup>i</sup> —Zn1—O3                                                                                                                            | 89.8        | C30—O12—Zn2 <sup>v</sup>                 | 123.3 (2)   |
| O11 <sup>ii</sup> —Zn1—O3                                                                                                                           | 90.3        | C20—O10—Zn1 <sup>i</sup>                 | 135.44 (13) |
| O2—Zn1—O1                                                                                                                                           | 93.5        | C30—O11—Zn1 <sup>v</sup>                 | 129.1 (2)   |
| O5—Zn1—O1                                                                                                                                           | 89.7        | C20—O9—Zn2 <sup>i</sup>                  | 119.84 (13) |
| O10 <sup>i</sup> —Zn1—O1                                                                                                                            | 175.3       | C10—O6—Zn2                               | 116.83 (12) |
| O11 <sup>ii</sup> —Zn1—O1                                                                                                                           | 86.5        | C10—O5—Zn1                               | 135.50 (12) |
| O3—Zn1—O1                                                                                                                                           | 86.2        | C33—O13—Zn4 <sup>iii</sup>               | 134.7 (3)   |
| O6—Zn2—O12 <sup>ii</sup>                                                                                                                            | 114.82 (6)  | C24—O15—Zn3                              | 133.9 (2)   |
| O6—Zn2—O9 <sup>i</sup>                                                                                                                              | 115.7       | C14—O7—Zn4 <sup>vi</sup>                 | 143.0 (2)   |
| O12 <sup>ii</sup> —Zn2—O9 <sup>i</sup>                                                                                                              | 112.8       | C14—O8—Zn3 <sup>vi</sup>                 | 124.29 (19) |
| O6—Zn2—O4                                                                                                                                           | 105.19 (6)  | C7—O3—Zn1                                | 121.0 (2)   |
| O12 <sup>ii</sup> —Zn2—O4                                                                                                                           | 104.12 (6)  | C35—O18—Zn3                              | 123.8 (3)   |
| O9 <sup>i</sup> —Zn2—O4                                                                                                                             | 102.34 (5)  | C4—O2—Zn1                                | 128.1 (4)   |
| O14 <sup>iii</sup> —Zn3—O8 <sup>iv</sup>                                                                                                            | 123.68 (6)  | C33—O14—Zn3 <sup>iii</sup>               | 130.2 (2)   |
| O14 <sup>iii</sup> —Zn3—O15                                                                                                                         | 110.36 (9)  | C1—O1—Zn1                                | 125.6 (3)   |
| O8 <sup>iv</sup> —Zn3—O15                                                                                                                           | 105.22 (8)  | C24—O16—Zn4                              | 130.8 (3)   |
| O14 <sup>iii</sup> —Zn3—O18                                                                                                                         | 107.65 (9)  | C38—O4—Zn2                               | 87.9 (4)    |
| <b>Symmetry codes: (i) 2-x, 1-y, 1-z; (ii) x, -1+y, z; (iii) 1-x, 2-y, 1-z; (iv) 3/2-x, 1/2+y, 3/2-z; (v) x, 1+y, z; (vi) 3/2-x, -1/2+y, 3/2-z.</b> |             |                                          |             |
